# Supplementary material
Source: publisher site journal article supplement (https://www.spandidos-publications.com/3436/downloadSupplementary)

Figure S1. PTEN silencing regulates cell-cycle progression in HeLa cells. Side scatter vs. forward scatter plots; FL3-A (area) vs. FL3-W (width) scatter plots; SSC vs. BrdU-FITC scatter plots; SSC vs. 7-AAD scatter plots; and histograms of 7-AAD expression in (A) control and (B) PTEN siRNA-transfected HeLa cells. siRNA, small interfering RNA; SSC, side angle light scatter channel.

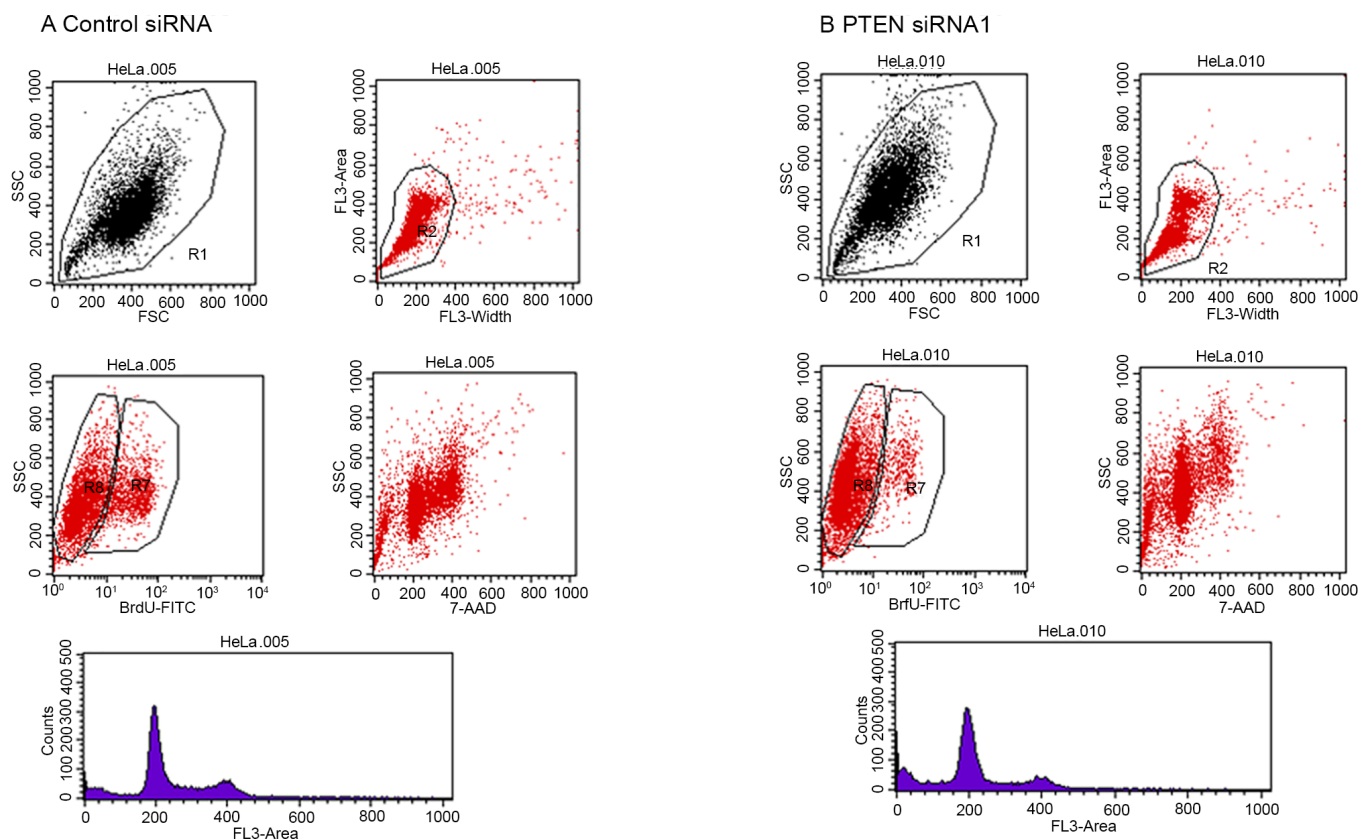

Supplement: Supplementary file 1 [file downloadSupplementary]
